# Supplementary material for: Effects of Honokiol on CYP450 Activity and Transporter mRNA Expression in Type 2 Diabetic Rats
Source: Int J Mol Sci. 2018 Mar 12;19(3):815. doi: 10.3390/ijms19030815 (PMC5877676; doi:10.3390/ijms19030815)
Supplement: Supplementary file 1 [file ijms-19-00815-s001.pdf]

## 1. Specificity

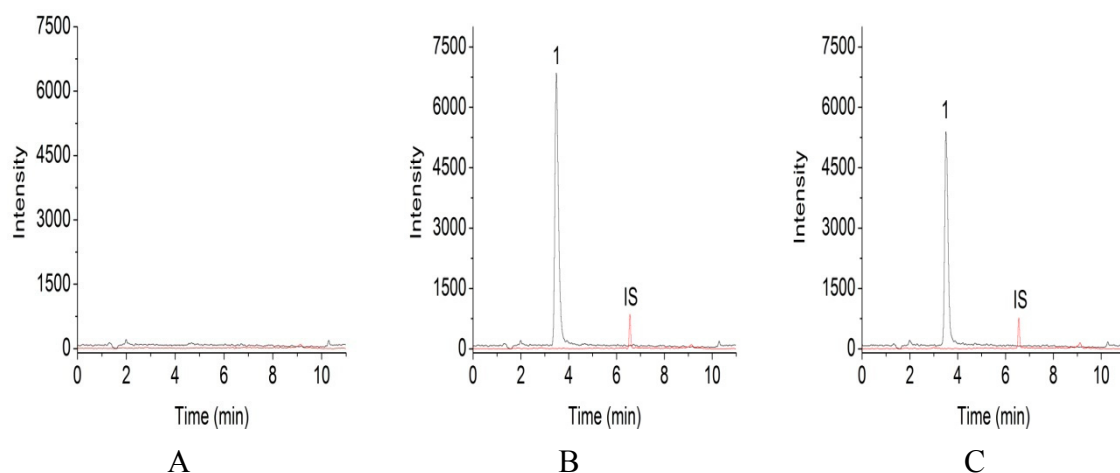

**Figure S1.** Typical chromatograms of acetaminophen in rat microsomes. A: blank microsomes; B: blank microsomes spiked with acetaminophen and IS(6 $\beta$ -hydroxytestosterone); C: microsomes incubated with phenacetin.

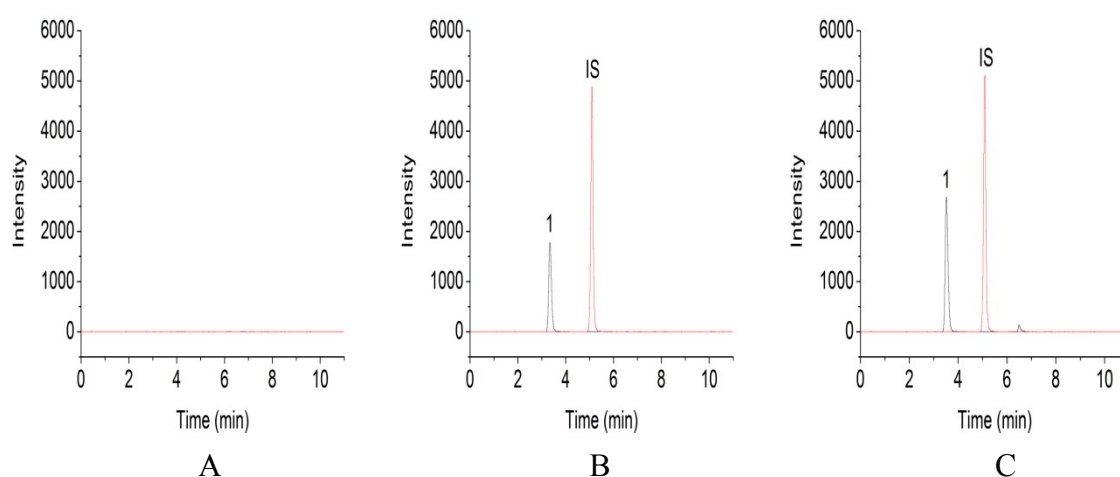

**Figure S2.** Typical chromatograms of 6-hydroxychlorzoxazone in rat microsomes. A: blank microsomes; B: blank microsomes spiked with 6-hydroxychlorzoxazone and IS(4'-hydroxytolbutamide); C: microsomes incubated with chlorzoxazone.

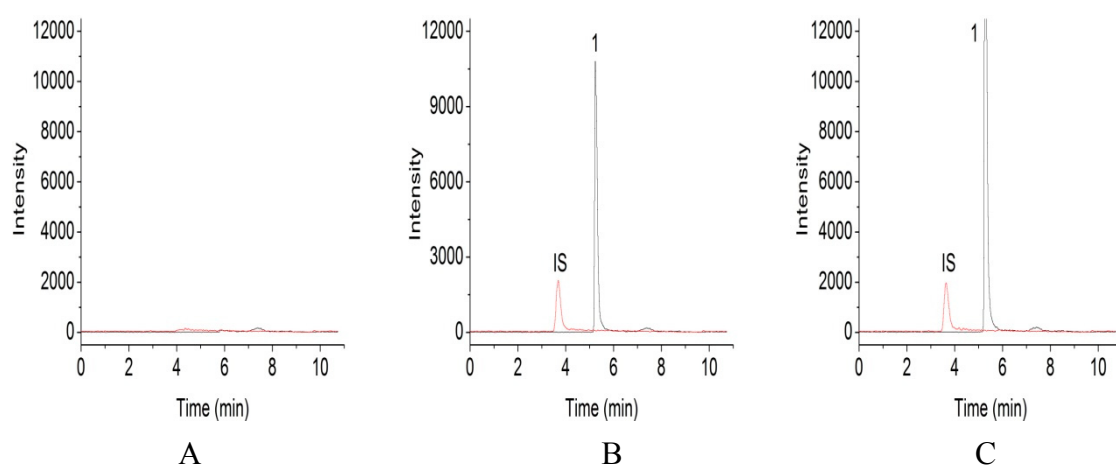

**Figure S3.** Typical chromatograms of hydroxybupropion in rat microsomes. A: blank microsomes; B: blank microsomes spiked with hydroxybupropion and IS(acetaminophen); C: microsomes incubated with bupropion.

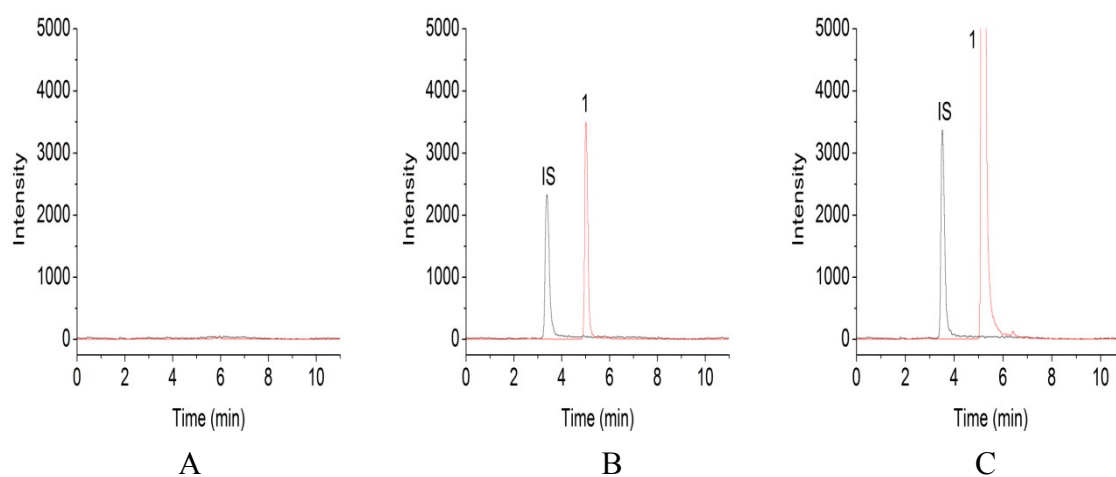

**Figure S4.** Typical chromatograms of 4'-hydroxytolbutamide in rat microsomes. A: blank microsomes; B: blank microsomes spiked with 4'-hydroxytolbutamide and IS (6-hydroxychlorzoxazone); C: microsomes incubated with tolbutamide.

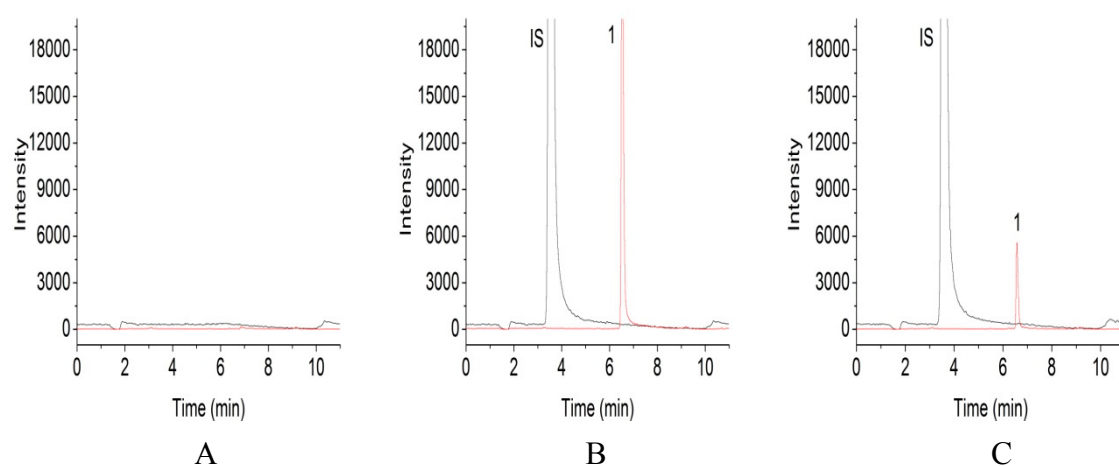

**Figure S5.** Typical chromatograms of 6 $\beta$ -hydroxytestosterone in rat microsomes. A: blank microsomes; B: blank microsomes spiked with acetaminophen and IS(acetaminophen); C: microsomes incubated with testosterone.

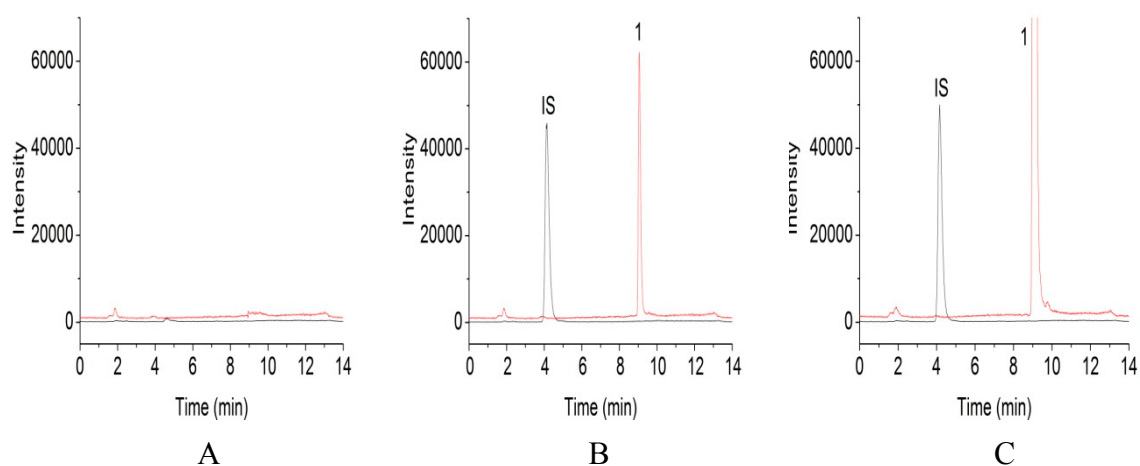

**Figure S6.** Typical chromatograms of 12-hydroxylauric acid in rat microsomes. A: blank microsomes; B: blank microsomes spiked with acetaminophen and IS (6-hydroxychlorzoxazone); C: microsomes incubated with lauric acid.

## 2. Calibration curves, accuracy and the precision

The linear ranges of the 6 metabolites mentioned in the manuscript were 0.16  $\mu$ M-10  $\mu$ M, 0.47  $\mu$ M-30  $\mu$ M, 0.94  $\mu$ M-30  $\mu$ M, 0.19  $\mu$ M-2  $\mu$ M, 0.10  $\mu$ M-3.20  $\mu$ M and 0.78  $\mu$ M-50  $\mu$ M, respectively. The linear equation of calibration curves, accuracy and the precision of the metabolites were presented in Table S1.

**Table S1.** Calibration curves, accuracy and precision for the tested metabolites (n=6),.

| Metabolite                     | Calibration Curves              | QC/ $\mu$ M | Intra-Assay/% |                  | Inter-Assay/% |                 |
|--------------------------------|---------------------------------|-------------|---------------|------------------|---------------|-----------------|
|                                |                                 |             | RSD           | Accuracy         | RSD           | Accuracy        |
| Acetaminophen                  | $Y=131.3x+53.7$<br>$r^2=1.000$  | 0.32        | 11.1          | 95.6 $\pm$ 10.6  | 3.2           | 103.2 $\pm$ 3.3 |
|                                |                                 | 1.25        | 6.3           | 99.0 $\pm$ 6.2   | 2.7           | 96.4 $\pm$ 2.6  |
|                                |                                 | 10.0        | 7.7           | 99.6 $\pm$ 7.7   | 5.9           | 105.1 $\pm$ 6.2 |
| 6-hydroxychlorzoxazone         | $Y=1561.0x+11.5$<br>$r^2=0.999$ | 0.94        | 6.9           | 96.6 $\pm$ 6.7   | 3.9           | 97.8 $\pm$ 3.8  |
|                                |                                 | 3.75        | 2.7           | 97.6 $\pm$ 2.6   | 2.3           | 98.6 $\pm$ 2.3  |
|                                |                                 | 30.0        | 4.6           | 99.3 $\pm$ 4.6   | 1.8           | 96.2 $\pm$ 1.7  |
| 4'-hydroxytolbutamide          | $Y=110.8x-65.2$<br>$r^2=0.996$  | 0.38        | 13.9          | 112.8 $\pm$ 5.7  | 6.1           | 102.3 $\pm$ 6.2 |
|                                |                                 | 1.50        | 6.5           | 102.1 $\pm$ 6.6  | 5.4           | 99.6 $\pm$ 5.4  |
|                                |                                 | 12.00       | 3.1           | 109.2 $\pm$ 4.7  | 7.7           | 97.3 $\pm$ 7.5  |
| 6 $\beta$ -hydroxytestosterone | $Y=469.5x-0.43$<br>$r^2=0.992$  | 0.94        | 12.3          | 96.0 $\pm$ 11.8  | 6.5           | 95.1 $\pm$ 6.2  |
|                                |                                 | 3.75        | 11.5          | 101.2 $\pm$ 11.6 | 5.3           | 99.8 $\pm$ 5.3  |
|                                |                                 | 30.00       | 7.0           | 104.3 $\pm$ 7.3  | 4.2           | 103.2 $\pm$ 4.3 |
| Hydroxybupropion               | $Y=18.29X-12.94$<br>$r^2=0.999$ | 0.20        | 6.8           | 91.4 $\pm$ 6.3   | 5.1           | 93.6 $\pm$ 4.8  |
|                                |                                 | 0.80        | 3.8           | 105.0 $\pm$ 4.0  | 2.0           | 102.6 $\pm$ 2.1 |
|                                |                                 | 3.20        | 2.3           | 98.1 $\pm$ 2.2   | 1.4           | 103.6 $\pm$ 1.4 |
| 12-hydroxylauric acid          | $Y=1132.1X+7.32$<br>$r^2=0.996$ | 1.56        | 5.7           | 113.2 $\pm$ 6.4  | 2.0           | 100.1 $\pm$ 2.0 |
|                                |                                 | 6.25        | 7.2           | 100.3 $\pm$ 7.2  | 3.4           | 104.5 $\pm$ 3.6 |
|                                |                                 | 50.0        | 3.0           | 91.4 $\pm$ 2.7   | 3.7           | 103.8 $\pm$ 3.8 |
